# Supplementary material for: Technology Licensing and Productivity Growth: Evidence from Manufacturing Firms in Developing Economies
Source: Atypon-hosted journal article supplement (doi:10.1287/msom.2020.0946), 2021-05-06
Supplement: msom.2020.0946.sm1.pdf [file msom.2020.0946.sm1.pdf]

## Online Supplement

**Table S1. Sample Distribution**

**A. Distribution by region**

|  | East Asia | South Asia |
|--|-----------|------------|
|  | 6,697     | 9,757      |

**B. Distribution by industry**

| Industry                            | N     |
|-------------------------------------|-------|
| Other Manufacturing                 | 3,047 |
| Food                                | 1,906 |
| Manufacturing                       | 1,515 |
| Garments                            | 1,249 |
| Rubber & Plastics Products          | 1,195 |
| Chemicals & Chemical Products       | 1,062 |
| Non-Metallic Mineral Products       | 1,054 |
| Textiles                            | 963   |
| Fabricated Metal Products           | 912   |
| Machinery & Equipment               | 751   |
| Electronics & Communications Equip. | 730   |
| Basic Metals & Metal Products       | 646   |
| Motor Vehicles                      | 599   |
| Leather Products                    | 218   |
| Electronics                         | 196   |
| Textiles & Garments                 | 166   |
| Machinery & Equipment & Electronics | 121   |
| Furniture                           | 85    |
| Motor Vehicles & Transport Equip.   | 39    |

**C. Distribution by country**

Afghanistan, Bangladesh, Bhutan, Cambodia, China, Fiji, India, Indonesia, Lao PDR, Malaysia, Micronesia, Fed. Sts., Mongolia, Myanmar, Nepal, Pakistan, Papua New Guinea, Philippines, Samoa, Solomon Islands, Sri Lanka, Thailand, Timor-Leste, Tonga, Vanuatu, Vietnam.

*Notes.* Data obtained from WBES— employed in recent studies (e.g., Assenova and Sorenson 2017, McCann and Bahl 2017, Lee and Weng 2013). Detailed information is available at <http://www.enterprisesurveys.org/about-us>.

**Table S2. Description of Control Variables**

| <b>Variables</b>                   | <b>Description</b>                                                                                                                                                                                                                                                         |
|------------------------------------|----------------------------------------------------------------------------------------------------------------------------------------------------------------------------------------------------------------------------------------------------------------------------|
| Country                            | 25 countries in South Asia and East Asia.                                                                                                                                                                                                                                  |
| Industry                           | 19 industries (represented using Standardized Industry Code).                                                                                                                                                                                                              |
| Year                               | Categorical variable representing the year of data collection for a given firm. Observations across 10 years from 2007 to 2016 were collected for firms in our study sample.                                                                                               |
| Firm Size                          | Logged value of number of full time employees.                                                                                                                                                                                                                             |
| Firm Productivity                  | Logged value of sales divided by number of full time employees. The sales are calculated by first converting the sale in the local currency to the U.S. dollars in that year, and then being deflated to 2009 using the U.S. GDP deflators from the reference fiscal year. |
| Firm Age                           | Logged value of number of years a firm has been in existence since establishment.                                                                                                                                                                                          |
| Legal Status:                      | Firms can operate with one of the following legal status: public, private limited liability, sole proprietorship, partnership, limited partnership, or others. We use five indicator variables to code the legal status, using public firm as the base reference category. |
| Legal Status - Private             | Coded as one if a firm operates as a private limited liability firm and zero otherwise.                                                                                                                                                                                    |
| Legal Status - Sole Proprietorship | Coded as one if the firm operates as a sole proprietorship firm and zero otherwise.                                                                                                                                                                                        |
| Legal Status - Partnership         | Coded as one if the firm operates as a partnership firm and zero otherwise.                                                                                                                                                                                                |
| Legal Status - Limited Partnership | Coded as one if the firm operates as a limited partnership firm and zero otherwise.                                                                                                                                                                                        |
| Legal Status - Other               | Coded as one if the firm operates with other types of legal status and zero otherwise.                                                                                                                                                                                     |
| Target Market:                     | Firms may target different markets for their operations. Some may focus on local markets, some on the national market, and others on international markets. We use two indicator variables to code the market focus categories, using local markets as the base category.  |
| Target Market - National           | Coded as one if the firm focuses on the national market and zero otherwise.                                                                                                                                                                                                |
| Target Market - International      | Coded as one if the firm focuses on international market and zero otherwise.                                                                                                                                                                                               |
| Ownership - Public                 | Coded as one if government ownership is 40 percent or higher and zero otherwise.                                                                                                                                                                                           |
| Ownership - Foreign                | Coded as one if foreign ownership is 40 percent or higher and zero otherwise.                                                                                                                                                                                              |
| Exporter                           | Coded as one if the firm is an exporter and zero otherwise.                                                                                                                                                                                                                |
| Credit Access                      | Coded as one if the firm has credit access to bank loans and zero otherwise.                                                                                                                                                                                               |
| Multi-Plant                        | Coded as one if the firm has more than one plant and zero otherwise.                                                                                                                                                                                                       |
| Informal Competition               | Coded as one if the firm competes against unregistered/informal firms and zero otherwise.                                                                                                                                                                                  |
| Competition Constraint             | Coded as one if the firm identifies practices of competitors in the informal sector as major constraint and zero otherwise.                                                                                                                                                |

*Notes.* Industry distribution is shown in Table S1.

**Table S3. Propensity Score Matching – Alternative Prediction Models**  
(Dependent Variable: Technology Licensing)

| <b>Variables</b>                  | <b>Probit Model</b> | <b>Cauchit Model</b> |
|-----------------------------------|---------------------|----------------------|
| Firm Size                         | 0.266 (0.012) ***   | 0.642 (0.037) ***    |
| Firm Productivity                 | 0.090 (0.010) ***   | 0.253 (0.029) ***    |
| Firm Age                          | -0.058 (0.022) ***  | -0.173 (0.070) **    |
| Legal Status: Private             | -0.178 (0.076) **   | -0.386 (0.178) **    |
| Legal Status: Sole Proprietorship | -0.064 (0.077)      | -0.140 (0.186)       |
| Legal Status: Partnership         | -0.083 (0.080)      | 0.059 (0.190)        |
| Legal Status: Limited Partnership | -0.202 (0.080) **   | -0.260 (0.190)       |
| Legal Status: Other               | -0.540 (0.137) ***  | -1.985 (0.779) **    |
| Target Market: National           | -0.078 (0.035) **   | -0.214 (0.120) *     |
| Target Market: International      | -0.081 (0.059)      | -0.317 (0.161) **    |
| Ownership: Public                 | -0.508 (0.161) ***  | -1.250 (0.620) **    |
| Ownership: Foreign Entities       | 0.489 (0.059) ***   | 1.087 (0.131) ***    |
| Exporter                          | 0.133 (0.044) ***   | 0.434 (0.107) ***    |
| Credit Access                     | 0.018 (0.030)       | 0.145 (0.087) *      |
| Multi-Plant                       | -0.132 (0.037) ***  | -0.360 (0.098) ***   |
| Informal Competition              | 0.071 (0.030) **    | 0.326 (0.088) ***    |
| Competition Constraint            | -0.143 (0.047) ***  | -0.491 (0.160) ***   |
| Intercept                         | -3.139 (0.200) ***  | -8.146 (0.664) ***   |
| Log Likelihood                    | -5311.472           | -5444.216            |
| Number of observations            | 15,759              | 15,759               |

Notes. \*\*\* p < 0.01, \*\* p < 0.05, \*p < 0.1. Robust standard errors are reported in the parentheses.

**Table S4. Effects of Technology Licensing on Productivity Growth – Alternative Matching Specifications**

| <b>Matching Method</b>                             | <b>Technology Licensing</b> | <b>Mean</b> | <b>SD</b> | <b>Mean Difference</b> | <b>t-test</b> |
|----------------------------------------------------|-----------------------------|-------------|-----------|------------------------|---------------|
| Propensity Score Matching<br>(Probit Model)        | No (n = 2,108 firms)        | 0.968       | 26.793    | -3.565                 | -4.405 ***    |
|                                                    | Yes (n = 2,108 firms)       | -2.597      | 25.743    |                        |               |
| Propensity Score Matching<br>(Cauchit Model)       | No (n = 2,108 firms)        | 0.750       | 27.324    | -3.347                 | -4.094 ***    |
|                                                    | Yes (n = 2,108 firms)       | -2.597      | 25.743    |                        |               |
| Coarsened Exact Matching<br>(Weighted Calculation) | No (n = 3,013 firms)        | -4.457      | 20.890    | -1.435                 | -2.001 **     |
|                                                    | Yes (n = 1,116 firms)       | -4.616      | 20.230    |                        |               |

Notes. \*\*\* p < 0.01, \*\* p < 0.05, \*p < 0.1. Standard errors in the parentheses. We use the weights from the coarsened exact matching procedure to calculate the weighted mean difference between treatment and control groups (in order to carry out this analysis, we do not use the sample stratification weights).

**Table S5. Heckman Selection Analysis: Accounting for Potential Endogeneity of Corruption**

| Variables                                                | First Stage                                     | Second Stage                                    |
|----------------------------------------------------------|-------------------------------------------------|-------------------------------------------------|
|                                                          | Probit Selection Model<br>DV = Corruption Level | Fixed Effects Model<br>DV = Productivity Growth |
| Intercept                                                | 1.243 (0.810)                                   | -                                               |
| Firm Size                                                | 0.058 (0.021) ***                               | 0.705 (0.475)                                   |
| Firm Productivity                                        | -0.024 (0.019)                                  | 2.785 (0.375) ***                               |
| Firm Age                                                 | -0.017 (0.041)                                  | -1.555 (0.677) **                               |
| Legal Status - Private                                   | 0.019 (0.117)                                   | 1.730 (1.754)                                   |
| Legal Status - Sole Proprietorship                       | -0.325 (0.124) ***                              | -0.995 (2.306)                                  |
| Legal Status - Partnership                               | 0.041 (0.127)                                   | 3.183 (2.237)                                   |
| Legal Status - Limited Partnership                       | -0.012 (0.125)                                  | 0.774 (1.880)                                   |
| Legal Status - Other                                     | 0.015 (0.251)                                   | 3.000 (3.694)                                   |
| Target market - National                                 | 0.099 (0.068)                                   | -0.688 (1.128)                                  |
| Target market - International                            | -0.005 (0.096)                                  | -3.676 (1.659) **                               |
| Ownership - Public                                       | 0.012 (0.325)                                   | 2.017 (5.442)                                   |
| Ownership - Foreign Entities                             | -0.085 (0.083)                                  | -1.341 (1.560)                                  |
| Exporter                                                 | 0.070 (0.070)                                   | 0.625 (1.175)                                   |
| Credit Access                                            | 0.341 (0.053) ***                               | 3.662 (1.528) **                                |
| Multi-Plant                                              | 0.020 (0.062)                                   | 1.138 (1.101)                                   |
| Informal Competition                                     | 0.230 (0.054) ***                               | 2.654 (1.674)                                   |
| Competition Constraint                                   | -0.095 (0.082)                                  | 3.452 (2.373)                                   |
| Corruption Intensity                                     | -4.894 (1.043) ***                              |                                                 |
| Inverse Mills Ratio (IMR)                                |                                                 | 12.066 (5.212) **                               |
| Technology Licensing                                     |                                                 | -9.422 (1.412) ***                              |
| Formal Workforce Training Program                        |                                                 | -4.603 (1.575) ***                              |
| Corruption Level                                         |                                                 | -2.649 (1.515) *                                |
| Infrastructure Constraint Level                          |                                                 | 1.701 (0.771) **                                |
| Technology Licensing × Formal Workforce Training Program |                                                 | 7.003 (1.702) ***                               |
| Technology Licensing × Corruption Level                  |                                                 | 6.052 (2.034) ***                               |
| Technology Licensing × Infrastructure Constraint Level   |                                                 | -1.700 (0.915) *                                |
| Log Likelihood                                           | -1789.479                                       | -                                               |
| R-squared                                                | -                                               | 0.152                                           |
| Number of observations                                   | 4,216                                           | 4,216                                           |

*Notes.* \*\*\*  $p < 0.01$ , \*\*  $p < 0.05$ , \*  $p < 0.1$ . Matched sample is used in the estimations. For the first stage probit selection model, robust standard errors are reported in the parentheses. For the second stage model, we include country-year and industry-year fixed effects and clustered standard errors by industry-year. *Corruption Intensity* measures the average of corruption level for all other firms located within the same country-industry-year as the focal firm.

**Table S6. Fixed Effects Model Predicting Productivity Growth – Using Alternative Measures of Corruption**

| Variables                                                | City Corruption Level<br>(Weighted by Industry) | Alternative Measure of Corruption<br>(% of Annual Sales) | Alternative Measure of Corruption<br>(Composite Score) |
|----------------------------------------------------------|-------------------------------------------------|----------------------------------------------------------|--------------------------------------------------------|
| Technology Licensing                                     | -8.397 (1.214) ***                              | -8.314 (1.733) ***                                       | -8.317 (1.233) ***                                     |
| Formal Workforce Training Program                        | -4.502 (1.580) ***                              | -5.773 (2.292) **                                        | -4.623 (1.620) ***                                     |
| Corruption Level                                         | -12.303 (7.097) *                               | -0.496 (0.090) ***                                       | -0.677 (0.551)                                         |
| Infrastructure Constraint Level                          | 2.022 (0.857) **                                | 2.366 (0.963) **                                         | 2.014 (0.823) **                                       |
| Technology Licensing × Formal Workforce Training Program | 7.604 (1.687) ***                               | 7.865 (2.248) ***                                        | 7.388 (1.662) ***                                      |
| Technology Licensing × Corruption Level                  | 10.689 (4.992) **                               | 0.415 (0.208) **                                         | 1.456 (0.809) *                                        |
| Technology Licensing × Infrastructure Constraint Level   | -1.897 (0.968) *                                | -2.820 (1.037) ***                                       | -1.970 (0.991) **                                      |
| R-squared                                                | 0.120                                           | 0.144                                                    | 0.119                                                  |
| Number of observations                                   | 4,216                                           | 2,709                                                    | 4,216                                                  |
| Industry-Year Fixed Effects                              | Yes                                             | Yes                                                      | Yes                                                    |
| Country-Year Fixed Effects                               | Yes                                             | Yes                                                      | Yes                                                    |

Notes. \*\*\* p < 0.01, \*\* p < 0.05, \* p < 0.1. Robust standard errors clustered by industry-year in the parentheses.

**Table S7. Propensity Score Matching for Firms in High Income Countries**  
(Dependent Variable: Technology Licensing)

| Variables                          | Using Logit Model  |
|------------------------------------|--------------------|
| Intercept                          | -3.508 (0.799) *** |
| Firm Size                          | 0.227 (0.049) ***  |
| Firm Productivity                  | 0.143 (0.052) ***  |
| Firm Age                           | -0.072 (0.083)     |
| Legal Status - Private             | -0.224 (0.174)     |
| Legal Status - Sole Proprietorship | -0.196 (0.266)     |
| Legal Status - Partnership         | -0.570 (0.559)     |
| Legal Status - Limited Partnership | -0.128 (0.759)     |
| Legal Status - Other               | -0.688 (0.647)     |
| Target Market - National           | 0.105 (0.131)      |
| Target Market - International      | 0.111 (0.203)      |
| Ownership - Public                 | -1.820 (1.117)     |
| Ownership - Foreign Entities       | 0.627 (0.160) ***  |
| Exporter                           | -0.136 (0.154)     |
| Credit Access                      | 0.130 (0.115)      |
| Multi-Plant                        | -0.472 (0.152) *** |
| Informal Competition               | 0.240 (0.140) *    |
| Competition Constraint             | -0.165 (0.155)     |
| Log Likelihood                     | -1,278.355         |
| Number of observations             | 3,257              |

Notes. \*\*\* p < 0.01, \*\* p < 0.05, \* p < 0.1. Robust standard errors in the parentheses. We include country-year and industry fixed effects in the logit model. The matching procedure uses nearest neighbor one-to-one propensity score matching within the same industry and country-year. The analysis sample is slightly lower than the initial sample due to missing data on matching variables and exclusion of observations from countries in which none of the firms used technology licensing in a given year. In this sample, the list of high income countries based on World Bank classification includes: Chile, Croatia, Czech Republic, Estonia, Israel, Latvia, Lithuania, Poland, Russian Federation, Slovak Republic, Slovenia, Sweden, and Uruguay.

**Table S8. Effect of Technology Licensing on Productivity Growth in High Income Countries**

| Matching Method        | Technology Licensing | Mean  | SD     | t-test |
|------------------------|----------------------|-------|--------|--------|
| Propensity Score       | No (n = 505 firms)   | 6.952 | 22.163 | 0.364  |
| Matching (Logit Model) | Yes (n = 505 firms)  | 7.484 | 24.190 |        |

*Notes.* \*\*\*  $p < 0.01$ , \*\*  $p < 0.05$ , \*  $p < 0.1$ . The difference in productivity growth of treatment group firms (i.e., firms with technology licensing) and control group firms (i.e., comparable firms without technology licensing) is statistically insignificant ( $t = 0.364$ ,  $p = 0.716$ ).

**Table S9. Fixed Effects Analysis Predicting Productivity Growth – For Firms in High Income Countries**

(Dependent Variable: Productivity Growth)

| Variables                                                | Model 1       | Model 2        | Model 3        |
|----------------------------------------------------------|---------------|----------------|----------------|
| Technology Licensing                                     | 0.554 (1.373) | 0.418 (1.452)  | 0.302 (2.362)  |
| Formal Workforce Training Program                        |               | 0.856 (1.608)  | 0.877 (1.994)  |
| Corruption Level                                         |               | 1.905 (3.280)  | -0.423 (4.307) |
| Infrastructure Constraint Level                          |               | -0.372 (1.049) | 0.598 (0.977)  |
| Technology Licensing × Formal Workforce Training Program |               |                | -0.265 (2.600) |
| Technology Licensing × Corruption Level                  |               |                | 3.947 (5.533)  |
| Technology Licensing × Infrastructure Constraint Level   |               |                | -1.897 (1.822) |
| R-squared                                                | 0.105         | 0.106          | 0.107          |
| Number of observations                                   | 1,010         | 1,010          | 1,010          |
| Industry-Year Fixed Effects                              | Yes           | Yes            | Yes            |
| Country-Year Fixed Effects                               | Yes           | Yes            | Yes            |

*Notes.* \*\*\*  $p < 0.01$ , \*\*  $p < 0.05$ , \*  $p < 0.1$ . Robust standard errors clustered by industry-year in the parentheses.

**Table S10. Fixed Effects Model – Controlling for Internal R&D  
(Dependent Variable: Productivity Growth)**

| Variables                                                               | Model 1:                              | Model 2:                                                              | Model 3:                                                    | Model 4:                                                                                                          |
|-------------------------------------------------------------------------|---------------------------------------|-----------------------------------------------------------------------|-------------------------------------------------------------|-------------------------------------------------------------------------------------------------------------------|
|                                                                         | Control for Internal R&D Main Effects | Control for Interaction between Internal R&D and Technology Licensing | Control for Interaction between Internal R&D and Corruption | Control for Interactions between: (i) Internal R&D and Technology Licensing, and (ii) Internal R&D and Corruption |
| Technology Licensing                                                    | -9.340 (1.314) ***                    | -10.703 (2.111) ***                                                   | -9.243 (1.330) ***                                          | -10.479 (2.157) ***                                                                                               |
| Formal Workforce Training Program                                       | -4.457 (1.620) ***                    | -4.281 (1.721) **                                                     | -4.401 (1.617) ***                                          | -4.245 (1.715) **                                                                                                 |
| Corruption Level                                                        | -2.907 (1.474) **                     | -2.872 (1.491) *                                                      | -5.973 (2.756) **                                           | -5.810 (2.820) **                                                                                                 |
| Infrastructure Constraint Level                                         | 1.876 (0.803) **                      | 1.934 (0.803) **                                                      | 1.909 (0.800) **                                            | 1.960 (0.800) **                                                                                                  |
| Technology Licensing × Formal Workforce Training Program                | 7.223 (1.661) ***                     | 6.985 (1.814) ***                                                     | 7.100 (1.669) ***                                           | 6.892 (1.817) ***                                                                                                 |
| Technology Licensing × Corruption Level                                 | 5.586 (2.007) ***                     | 5.480 (2.039) ***                                                     | 5.324 (1.967) ***                                           | 5.243 (1.998) ***                                                                                                 |
| Technology Licensing × Infrastructure Constraint Level                  | -1.811 (0.917) **                     | -1.906 (0.919) **                                                     | -1.850 (0.914) **                                           | -1.934 (0.917) **                                                                                                 |
| <b>Additional Controls</b>                                              |                                       |                                                                       |                                                             |                                                                                                                   |
| Internationally Recognized Quality Certification                        | -2.489 (0.870) ***                    | -2.078 (1.070) *                                                      | -2.224 (0.979) **                                           | -1.879 (1.299)                                                                                                    |
| External Auditing                                                       | 0.747 (1.222)                         | 0.023 (1.741)                                                         | 0.122 (1.290)                                               | -0.524 (1.754)                                                                                                    |
| Owning a Website                                                        | 1.822 (1.246)                         | 1.245 (1.625)                                                         | 1.534 (1.653)                                               | 1.059 (1.995)                                                                                                     |
| Technology Licensing × Internationally Recognized Quality Certification |                                       | -0.823 (1.695)                                                        |                                                             | -0.726 (1.636)                                                                                                    |
| Technology Licensing × External Auditing                                |                                       | 1.497 (2.354)                                                         |                                                             | 1.374 (2.340)                                                                                                     |
| Technology Licensing × Owning a Website                                 |                                       | 1.238 (1.631)                                                         |                                                             | 1.079 (1.607)                                                                                                     |
| Corruption Level × Internationally Recognized Quality Certification     |                                       |                                                                       | -1.185 (2.625)                                              | -1.108 (2.568)                                                                                                    |
| Corruption Level × External Auditing                                    |                                       |                                                                       | 3.650 (2.270)                                               | 3.536 (2.313)                                                                                                     |
| Corruption Level × Owning a Website                                     |                                       |                                                                       | 1.361 (2.672)                                               | 1.230 (2.619)                                                                                                     |
| R-squared                                                               | 0.122                                 | 0.122                                                                 | 0.123                                                       | 0.123                                                                                                             |
| Number of Observations                                                  | 4,216                                 | 4,216                                                                 | 4,216                                                       | 4,216                                                                                                             |
| Industry-Year Fixed Effects                                             | Yes                                   | Yes                                                                   | Yes                                                         | Yes                                                                                                               |
| Country-Year Fixed Effects                                              | Yes                                   | Yes                                                                   | Yes                                                         | Yes                                                                                                               |

Notes. \*\*\* p < 0.01, \*\* p < 0.05, \* p < 0.1. Robust standard errors clustered by industry-year are reported in the parentheses. *Internationally Recognized Quality Certification* is coded as one for firms with certification like ISO 9000, 14000, or HAPC, and zero otherwise. *External Auditing* is coded as one for firms with annual financial statements checked and certified by an external auditor, and zero otherwise. *Owning a Website* is coded as one for firms with its own website, and zero otherwise.

**Figure S1. Distribution of Propensity Scores across Treatment and Matched Control Groups**

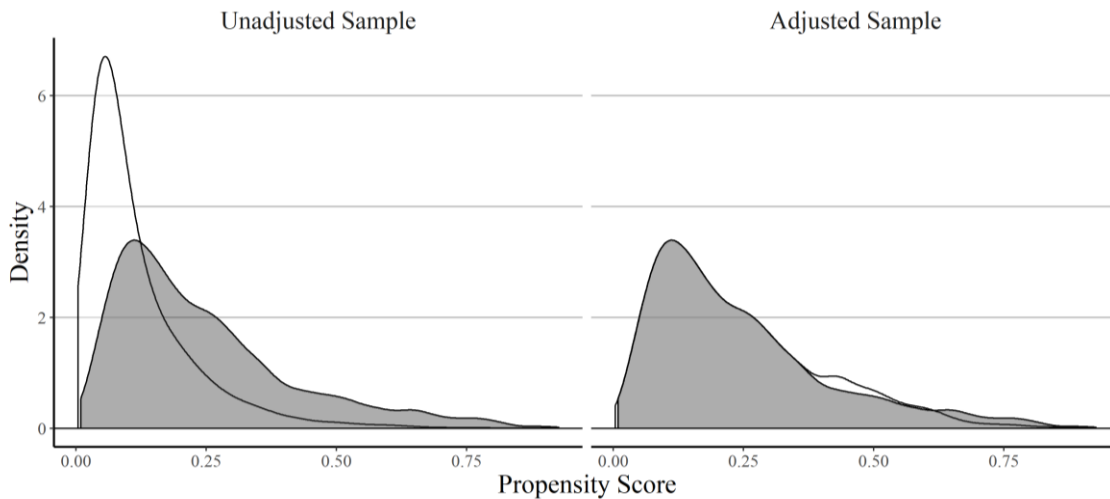

Notes. The Kolmogorov-Smirnov test for equality of distributions fails to reject the null hypothesis of equality of distributions between the treatment and matched control groups ( $D = 0.029$ ,  $p = 0.341$ ).
